# Supplementary material for: Norepinephrine Leads to More Cardiopulmonary Toxicities than Epinephrine by Catecholamine Overdose in Rats
Source: PubMed Central journal article supplement (PMC7560392; doi:10.3390/toxics8030069), 2020-09-16
Supplement: toxics-08-00069-s001.pdf [file toxics-08-00069-s001.pdf]

## Supplementary Materials: Norepinephrine Leads to More Cardiopulmonary Toxicities than Epinephrine by Catecholamine Overdose in Rats

Wen-Hsien Lu, Hsin-Hung Chen, Bo-Hau Chen, Jui-Chen Lee, Chi-Cheng Lai, Che-Hsing Li and Ching-Jiunn Tseng

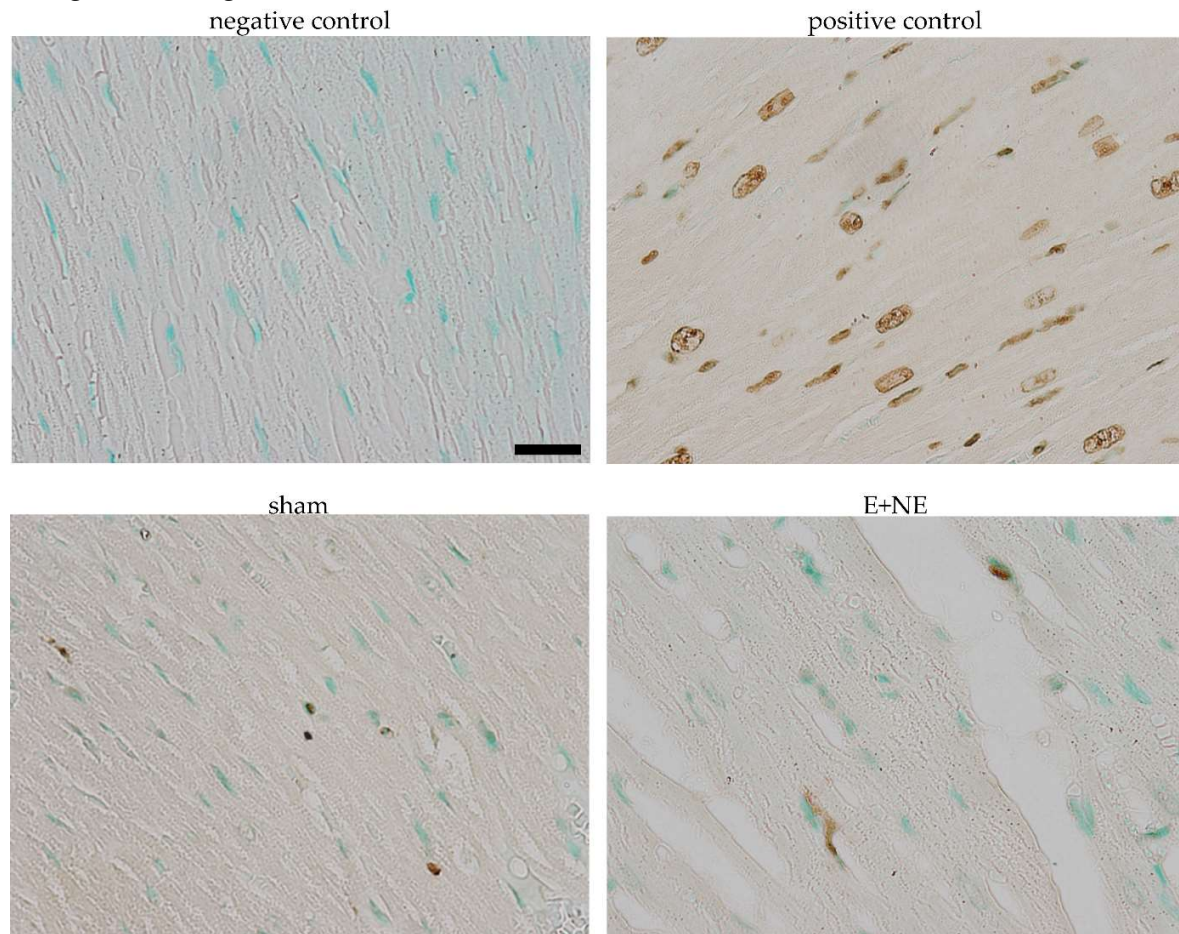

**Figure S1.** Apoptosis induced by catecholamine overdose through Terminal deoxynucleotidyl transferase dUTP nick end labeling assay. Sham, 0.9% saline injection group; E+NE, epinephrine and norepinephrine injection group.

**Table S1.** The echocardiographic parameters of the 4 group at 0-h and 6-h post-intravenous continuous infusion of epinephrine and/or norepinephrine.

| Parameters         | Echocardiographic parameters |                  |         |                  |                  |         |                  |                  |         |                  |                  |         |
|--------------------|------------------------------|------------------|---------|------------------|------------------|---------|------------------|------------------|---------|------------------|------------------|---------|
|                    | sham (n = 3)                 |                  |         | E (n = 6)        |                  |         | NE (n = 6)       |                  |         | E+NE (n = 6)     |                  |         |
|                    | 0 h<br>(Mean±SD)             | 6 h<br>(Mean±SD) | p value | 0 h<br>(Mean±SD) | 6 h<br>(Mean±SD) | p value | 0 h<br>(Mean±SD) | 6 h<br>(Mean±SD) | p value | 0 h<br>(Mean±SD) | 6 h<br>(Mean±SD) | p value |
| Body weight (g)    | 378.7±10.97                  |                  |         | 367.17 ± 12.56   |                  |         | 372.5 ± 15.53    |                  |         | 378.67 ± 3.95    |                  |         |
| HR (bpm)           | 355.12 ± 42.93               | 368.12 ± 35.14   | 0.273   | 333.92 ± 40.84   | 487.27 ± 82.88*  | 0.028   | 302.69 ± 19.90   | 524.91 ± 51.55*  | 0.028   | 329.76 ± 22.59   | 457.16 ± 73.25*  | 0.028   |
| IVSd (mm)          | 1.83 ± 0.14                  | 1.80 ± 0.04      | 0.715   | 1.88 ± 0.22      | 2.51 ± 0.56      | 0.046   | 1.73 ± 0.06      | 3.27 ± 0.24*†    | 0.028   | 2.05 ± 0.31      | 3.24 ± 0.33*     | 0.028   |
| LVIDd (mm)         | 7.090 ± 0.44                 | 7.18 ± 0.16      | 0.273   | 7.37 ± 0.30      | 5.64 ± 1.36      | 0.046   | 7.15 ± 0.48      | 4.16 ± 1.07*     | 0.028   | 7.04 ± 0.48      | 3.20 ± 0.44*†    | 0.028   |
| LVIDs (mm)         | 4.69 ± 0.22                  | 4.70 ± 0.14      | 0.715   | 4.70 ± 0.57      | 2.66 ± 1.65*     | 0.046   | 4.15 ± 0.80      | 2.40 ± 1.25*     | 0.028   | 4.48 ± 0.45      | 1.23 ± 0.33*†    | 0.028   |
| LVPWd (mm)         | 1.39 ± 0.06                  | 1.21 ± 0.12      | 0.144   | 1.62 ± 0.13      | 2.39 ± 0.68*     | 0.046   | 1.53 ± 0.22      | 2.98 ± 0.54*     | 0.028   | 1.47 ± 0.13      | 3.40 ± 0.47*†    | 0.028   |
| LVd Mass (ASE, g)  | 1.22 ± 0.07                  | 1.17 ± 0.04      | 1.000   | 1.34 ± 0.10      | 1.42 ± 0.20*     | 0.116   | 1.23 ± 0.06      | 1.48 ± 0.14*     | 0.028   | 1.30 ± 0.12      | 1.37 ± 0.10*     | 0.173   |
| EF (Teich, %)      | 68.27 ± 2.03                 | 69.32 ± 1.71     | 0.465   | 70.99 ± 7.47     | 85.77 ± 15.88    | 0.046   | 76.80 ± 9.55     | 78.64 ± 15.76*   | 0.753   | 71.27 ± 5.93     | 93.58 ± 2.79*    | 0.028   |
| FS (%)             | 33.85 ± 1.66                 | 34.56 ± 1.25     | 0.465   | 36.26 ± 5.98     | 55.47 ± 18.05    | 0.046   | 41.75 ± 9.17     | 45.70 ± 16.33*   | 0.600   | 36.41 ± 4.87     | 62.09 ± 5.24*    | 0.028   |
| EDV (Teich, mL)    | 0.81 ± 0.13                  | 0.84 ± 0.54      | 0.273   | 0.90 ± 0.10      | 0.48 ± 0.29      | 0.046   | 0.81 ± 0.15      | 0.21 ± 0.13*     | 0.027   | 0.80 ± 0.15      | 0.09 ± 0.03*†    | 0.028   |
| ESV (Teich, mL)    | 0.25 ± 0.03                  | 0.26 ± 0.02      | 0.715   | 0.26 ± 0.09      | 0.10 ± 0.15      | 0.046   | 0.19 ± 0.09      | 0.06 ± 0.06*     | 0.028   | 0.23 ± 0.06      | 0.01 ± 0.00*     | 0.028   |
| SV (Teich, mL)     | 0.56 ± 0.10                  | 0.58 ± 0.04      | 0.273   | 0.63 ± 0.07      | 0.38 ± 0.17*     | 0.028   | 0.62 ± 0.11      | 0.15 ± 0.07*     | 0.028   | 0.57 ± 0.12      | 0.08 ± 0.03*†    | 0.028   |
| CO (Teich, ml/min) | 196.50 ± 21.04               | 217.09 ± 32.77   | 0.144   | 202.75 ± 30.09   | 180.98 ± 80.83   | 0.600   | 191.91 ± 30.53   | 88.93 ± 56.02*   | 0.028   | 184.78 ± 31.10   | 38.14 ± 20.91*†  | 0.028   |
| MV E Vel (m/s)     | 0.73 ± 0.09                  | 0.80 ± 0.11      | 0.144   | 0.77 ± 0.04      | 0.57 ± 0.05*     | 0.028   | 0.78 ± 0.08      | 0.37 ± 0.07*†    | 0.028   | 0.74 ± 0.06      | 0.33 ± 0.06*†    | 0.028   |
| MV A Vel (m/s)     | 0.57 ± 0.18                  | 0.71 ± 0.11      | 0.144   | 0.47 ± 0.14      | 0.90 ± 0.09      | 0.028   | 0.46 ± 0.06      | 0.74 ± 0.19      | 0.028   | 0.63 ± 0.14      | 0.69 ± 0.19      | 0.173   |
| MV E/A Ratio       | 1.38 ± 0.48                  | 1.15 ± 0.35      | 0.715   | 1.77 ± 0.50      | 0.64 ± 0.10*     | 0.028   | 1.65 ± 0.16      | 0.50 ± 0.05*†    | 0.028   | 1.24 ± 0.36      | 0.49 ± 0.08*†    | 0.028   |

Data are expressed as means ± SD; CO, cardiac output; E, epinephrine; E+NE, epinephrine and norepinephrine; EDV, end-diastolic volume; EF, ejection fraction; ESV, end-systolic volume; FS, fractional shortening; HR, heart rate; IVSd, interventricular septum thickness at end –diastole; LVd Mass, the left ventricular mass at end diastole; LVIDd, left ventricular internal dimension at end –diastole; LVIDs, left ventricular internal dimension at end –systole; LVPWd, left ventricular posterior wall thickness at end –diastole; MV A vel, peak late diastolic mitral valve velocity; MV E vel, peak early diastolic mitral valve velocity; NE, norepinephrine; sham, 0.9% saline; SV, stroke volume. \**p* < 0.05 vs. sham group. †*p* < 0.05 vs. E group.
